# Supplementary material for: A lamprey from the Devonian period of South Africa
Source: Springer Nature journal article supplement (doi:10.1038/nature05150), 2006-10-01
Supplement: 41586_2006_BFnature05150_MOESM1_ESM.doc [file 41586_2006_BFnature05150_MOESM1_ESM.doc]

**A lamprey from the Devonian of South Africa**by Gess et al.

Nature reference: 2006-02-01512A

**Supplementary information**

**Specimen photography**

The specimen (Fig. 1, AM5750) shows a directional mineral fabric, illuminating at one angle to directional light and becoming extinct at 90 degrees thereto. Photographs were taken with a cable release, in one-directional light, using a Nikon SLR with macro lens, mounted on a tripod. Images taken at minimum aperture were recorded on B/W emulsion film, from which prints were produced. Immersion of the specimen to enhance contrast was precluded by the extremely absorbant and friable nature of both specimen and matrix. No digital image enhancement procedure has been used.

**Phylogenetic analysis**

All analyses were completed using the program PAUP* (ref. 22), employing the branch and bound search algorithm, computed stepwise with the furthest addition sequence. All 42 optimal trees were saved. Tree statistics and strict consensus topology are provided in Fig. 3a.

**Taxa**

Taxa were selected on the basis of their use in recent analyses, namely those in refs 2, 17, and 18. The present work did not set out to duplicate the detailed tests run in refs 2 and 18. For this reason, large terminal groups were included, in full awareness of the additional hypotheses of monophyly that these clades bring to the present work. Twenty one taxa were included. Cephalochordates (amphioxus) and tunicates were used as the outgroup. Other taxa are: Myxinoidea - hagfish (Recent), *Myxinikela* (Carboniferous), *Haikouichthys* (Early Cambrian), *Euphanerops* (Devonian), *Mayomyzon* (Carboniferous), *Priscomyzon* (Devonian), *Mesomyzon* (Cretaceous), Petromyzontida - lampreys (Recent), Euconodonta (Late Cambrian-Triassic), *Jamoytius* (Silurian), Anaspida (Silurian-Devonian), *Astraspis* (Ordovician), Heterostraci (Silurian-Devonian), Arandaspida (Ordovician), *Loganellia* (Silurian), *Turinia* (Devonian), Galeaspida (Silurian-Devonian), Osteostraci (Silurian-Devonian), jawed vertebrates (Ordovician-Recent). *Mayomyzon* is treated as an adult because of lack of evidence regarding possible ancient lamprey metamorphosis. Should described *Mayomyzon* material represent subadults, it may be characterised by primitive features not typical of the adult form (ref. 9). *Hardistiella* (ref. 10) is not included in the analyses because of the limited information available to code into the character matrix.

**Characters**

Most of the 115 characters are from Janvier (ref. 17), subsequently reviewed by Donoghue and colleagues (refs 2 and 18). For discussions of characters, readers should refer to these sources, as well as sources including refs 1 and 20. In the case of polymorphic characters for higher taxa (e.g. gill number in galeaspids), the state coded for here is the state that appears plesiomorphous in current phylogenies (of these taxa). However, some new characters were added and others recoded in the light of recent discoveries. Several of these concern conditions of the so-called ‘naked anaspid’ *Euphanerops*, which is now known to have cyclostome-like cartilage, and, in particular respects, lamprey-like gills (refs 3 and 21). Additional morphological characters are used to describe features of the feeding apparatus of hagfish and lampreys. These observations were taken initially from Yalden’s argument for cyclostome monophyly (ref. 14), and, as in this earlier work, observations were checked against original dissections of hagfish and lamprey material (MIC). Yalden generated a list of eleven potential synapomorphies of Recent hagfishes and lampreys, all of which were summarized in the single character “cartilaginous copula associated with tongue protractor and retractor muscles: absent/present”, used in refs 2 and 18. Here, this complex of features is expanded (conservatively) to three characters, numbers 62-64. Other characters were included to describe the position of the otic capsule, the presence of series of circumoral teeth, and the anteriormost level of dorsal fin insertion. Most characters used in the present analyses are binary; in instances where character codes are hierarchical, inapplicable (‘?’) scores are entered for conditions in taxa where codes are illogical. Where multistate characters are used, these are treated as unordered in all analyses.

**Character re-weighting, enforced constraints, and reduced taxon subset**

Character re-weighting was imposed according to rescaled consistency index (RC) and best-fit options in PAUP*.

Cyclostome monophyly has been found repeatedly in analyses of nuclear, mitochondrial, and other molecular sequence data (refs 19, 20). Recent palaeontological studies have identified cyclostome characteristics in stemgroup gnathostomes (refs 3, 21), and gnathostome-like characters in the earliest craniates (ref. 23). For these reasons it was considered timely to explore the implications of cyclostome monophyly for the growing morphological data set used to analyse relationships of jawless fossil vertebrates.

Following the results of the initial analysis, a polytomy subtending Myxinoidea - hagfish (Recent), *Myxinikela* (Carboniferous), *Euphanerops* (Devonian), *Mayomyzon* (Carboniferous), *Priscomyzon* (Devonian), *Mesomyzon* (Cretaceous) and Petromyzontida - lampreys (Recent) was imposed. This topological constraint was loaded as a ‘backbone’ in the branch and bound option, saving all compatible trees. A strict consensus of the resultant six trees is shown in Supplementary Figure 1a.

In addition, analysis of a reduced taxon set was undertaken to explore underlying signal in the data matrix. The Agreement Subtrees option in PAUP* produced a tree excluding *Haikouichthys*, *Euconodonta*, *Jamoytius*, and *Euphanerops*; *Myxinikela*, *Mayomyzon*, *Mesomyzon*, and Galeaspida were also cut from this supplementary analysis. The resultant tree is shown in Supplementary Figure 1b. Bremer support (decay) and bootstrap values identify robust nodes within the basic architecture of a morphology-based phylogeny of basal vertebrates including fossil taxa (compare values with those shown in Figure 3a). Support for *Priscomyzon* as a lamprey, the gnathostome total group, and the Vertebrata is strong. In contrast, relationships among arandaspids, heterostracans, and thelodonts within the gnathostome stem group are much weaker.


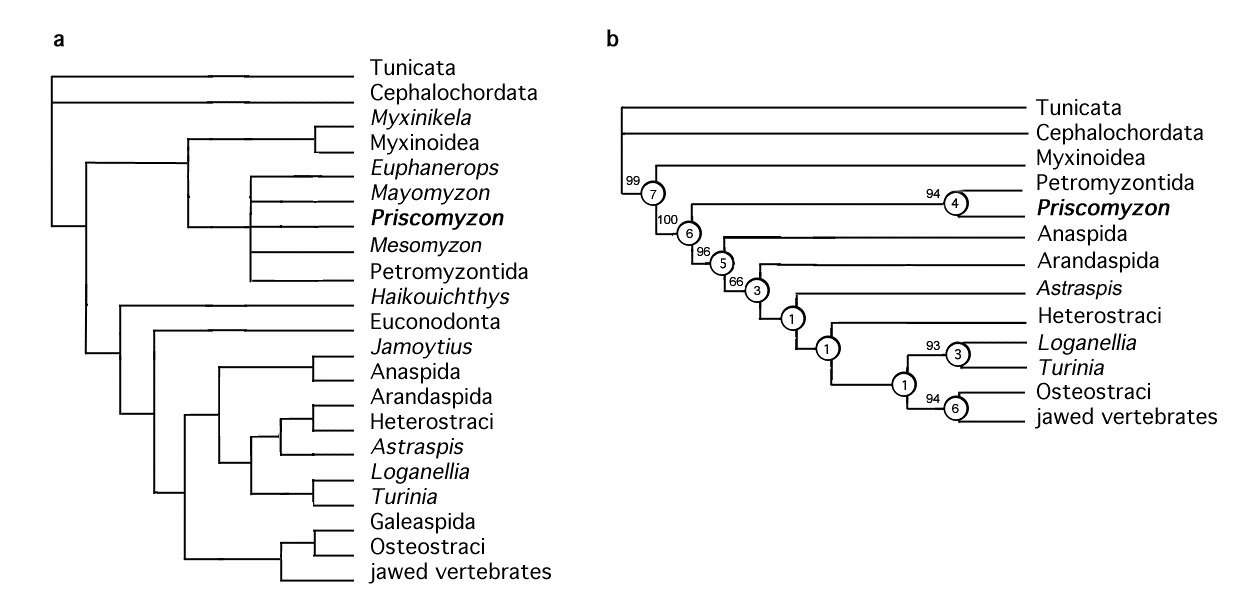


**Supplementary Figure 1** I  **a**, Strict consensus of six trees obtained when cyclostome monophyly is enforced as a backbone constraint. Tree length extended from 211 to 236 steps, most of which accounts for reversals along the branch leading to myxinoids. The structure of the gnathostome stemgroup is changed, with thelodonts (*Loganellia* and *Turinia*) joined to a monophyletic clade of anaspids, arandaspids, heterostracans, and *Astraspis*. **b,** Single tree obtained from reduced taxon set (no enforced constraints; cyclostomes paraphyletic), showing robust support for hypothesized stem-gnathostome relationships for majority of fossil jawless vertebrates (compare values with those shown in Figure 1). Tree length 181 steps, consistency index 0.73, homoplasy index 0.27, retention index 0.73, rescaled consistency index 0.53. Bremer support values circled at nodes; bootstrap values (10,000 replicates) shown adjacent.

**Character list.**

*(a) Brain, sensory and nervous system*

1. Neural crest absent = 0, present = 1

2. Olfactory peduncles absent = 0, present = 1

3. Pineal organ absent = 0, present and covered = 1, present and uncovered = 2

4. Pituitary divided to adenohypophysis and neurohypophysis absent = 0, present = 1

5. Adenohypophysis absent = 0, simple = 1, segmented and compartmentalised = 2

6. Optic tectum absent = 0, present = 1

7. Cerebellum absent = 0, present = 1

8. Pretrematic branches in branchial nerves absent = 0, present = 1

9. Flattened spinal chord absent = 0, present = 1

10. Ventral and dorsal spinal nerve roots united, absent = 0, present = 1

11. Mauthner fibres in central nervous system absent = 0, present = 1

12. Synaptic ribbons in retinal receptors absent = 0, present = 1

13. Number of nasal openings: none = 0, paired = 1, single median = 2

14. Nasohypophyseal opening serving respiration (nasohypophyseal duct) absent = 0, present = 1

15. Single nasohypophyseal opening, absent = 0, present = 1

16. Position of nasohypophyseal opening: none = 0, terminal = 1, dorsal = 2

17. Olfactory organ absent = 0, paired = 1, unpaired = 2

18. Extrinsic eye musculature absent = 0, present = 1

19. Otic capsule anterior to branchial series, absent = 0, present = 1

20. Number of semicircular canals in labyrinth: none = 0, one = 1, two = 2, three = 3

21. Vertical semicircular canals forming loops, absent = 0, present = 1

22. Externally open endolymphatic ducts absent = 0, present = 1

23. Sensory-line system with neuromasts absent = 0, present = 1

24. Electroreceptive cells absent = 0, present = 1

25. Sensory-line grooves or canals absent = 0, present on head only = 1, present on head plus body = 2

26. Sensory-line absent = 0, enclosed in grooves = 1, enclosed in canals = 2

*(b) Mouth and branchial sytem*

27. Pouch-shaped gills absent = 0, present = 1

28. Single confluent branchial opening, absent = 0, present = 1

29. Elongate branchial series: more than 10 gill pouches/slits = 0, fewer than 10 = 1

30. Gill openings lateral and arranged in slanting row, absent = 0, present = 1

31. Position of gill openings: laterally = 0, ventrally = 1

32. Opercular flaps associated with gill openings, absent = 0, present = 1

33. Endodermal gill lamellae, absent = 0, present = 1

34. Gill lamellae with filaments, absent = 0, present = 1

35. Mouth terminal = 0, ventral = 1

36. Oral hood absent = 0, present = 1.

37. Velum absent = 0, present = 1

*(c) Circulatory system*

38. Relative position of atrium and ventricle of heart: well separated = 0, close to each other = 1

39. Closed pericardium absent = 0, present = 1

40. Open blood system absent = 0, present = 1

41. Paired dorsal aortae absent = 0, present = 1

42. Large lateral head vein absent = 0, present = 1

43. True lymphocytes absent = 0, present = 1

44. Subaponeurotic vascular plexus absent = 0, present = 1

*(d) Fins and fin-folds*

45. Dorsal fin: separate dorsal fin absent = 0, present = 1

46. Dorsal fin originates at posterior of branchial series = 0, restricted to posterior of trunk and/or caudal region = 1.

47. Anal fin separate, absent = 0, present = 1.

48. Unpaired fin ray supports closely set, absent = 0, present = 1

49. Paired lateral fin folds absent = 0, present = 1

50. Constricted pectorals absent = 0, present = 1

51. Pelvic fins/flap, absent = 0, present = 1

52. Tail shape: no distinct lobes developed = 0, ventral lobe much larger than dorsal = 1, dorsal lobe much larger than ventral = 2, dorsal and ventral lobes almost equally developed = 3.

53. Chordal disposition relative to tail development, isochordal = 0, hypochordal = 1, hyperchordal = 2

54. Preanal median fold absent = 0, present = 1

*(e) Skeletal*

55. Ability to synthesise creatine phosphatase absent = 0, present = 1

56. Visceral arches fused to the neurocranium absent = 0, present =1

57. Horny teeth absent = 0, present = 1

58. Circumoral teeth absent = 0, present = 1

59. Circumoral teeth arranged in radiating series, absent = 0, present = 1

60. Trematic rings absent = 0, present = 1

61. Arculia absent = 0, present = 1

62. Piston cartilage and apical plate, absent = 0, present = 1.

63. Midline retractor muscle, dorsal to piston cartilage, and paired protractor muscles, absent = 0, present = 1.

64. Longitudinally aligned tooth rows providing transverse bite, absent = 0, present 1.

65. Jaws (dorsoventral bite), absent 0, present = 1

66. Chondroitin 6-sulphate in cartilage, absent = 0, present = 1

67. Braincase with lateral walls, absent = 0, present = 1.

68. Neurocranium entirely closed dorsally and covering the brain, absent = 0, present = 1

69. Occiput enclosing vagus and glossopharyngeal nerves, absent = 0, present = 1

70. Annular cartilage absent = 0, present = 1

71. Large oral disc absent = 0, present = 1

72. Tentacles strengthened by cartilages; absent = 0, present = 1

73. Trunk dermal skeleton absent = 0, present = 1

74. Perichondral bone absent = 0, present = 1

75. Calcified cartilage absent = 0, present = 1

76. Cartilage composed of huge clumped chondrocytes, absent = 0, present = 1.

77. Calcified dermal skeleton absent = 0, present = 1

78. Lamellar aspidin, absent = 0, present = 1

79. Cellular bone, absent = 0, present = 1

80. Dentine absent = 0, present = 1

81. Dentine absent = 0, mesodentine = 1, orthodentine = 2.

82. Enamel/oid absent = 0, (monotypic) enamel = 1, enameloid (bitypic enamel) = 2

83. Three-layered exoskeleton consisting of a basal lamella, middle spongy (or cancellar) layer and a superficial (often ornamented) layer: absent = 0, present = 1

84. Cancellar layer in exoskeleton, with honeycomb-shaped cavities, absent = 0, present = 1

85. Composition of the scales/denticles/teeth: absent = 0, made up by single odontode = 1, made up by several odontodes = 2

86. Scale shape: scale absent = 0, diamond-shaped = 1, rod-shaped = 2.

87. Oak-leaf-shaped tubercles, absent = 0, present = 1

88. Oral plates absent = 0, present = 1

89. Denticles in pharynx absent = 0, present = 1

90. Dermal head covering in adult state: absent = 0, small micromeric = 1, large (macromeric) dermal plates or shield = 2

91. Large unpaired ventral and dorsal dermal plates on head, absent = 0, present = 1

92. Massive endoskeletal head shield covering the gills dorsally, absent = 0, present = 1

93. Sclerotic ossicles absent = 0, present = 1

94. Ossified endoskeletal sclera encapsulating the eye, absent = 0, present = 1

*(f) Physiological*

95. Blood volume more than 10% of body volume = 0, less than 10% =1

96. Haemoglobins with low oxygen affinity and significant Bohr effect, absent = 0, present = 1

97. Nervous regulation of heart, absent = 0, present = 1

98. Heart response to catecholamines, absent = 0, present = 1

99. High blood pressure, absent = 0, present = 1

100. Hyperosmoregulation, absent = 0, present = 1

101. High proportion of serine and theronine collagen, absent = 0, present = 1

102. Presence of lactate dehydrogenase 5, absent = 0, present = 1

103. Pituitary control of melanophores, absent = 0, present = 1

104. Pituitary control of gametogenesis, absent = 0, present = 1

105. High metabolic rate, absent = 0, present = 1

106. Ion transport in gills, absent = 0, present = 1

*(g) Miscellaneous*

107. Typhlosole in intestine, absent = 0, present = 1

108. Spleen absent = 0, present = 1

109. Collecting tubules in kidneys absent = 0, present = 1

110. Condensed and discrete pancreas absent = 0, present = 1

111. *A* islet cells in endocrine pancreas absent = 0, present = 1

112. Male gametes shed directly through the coelom, absent = 0, present = 1

113. Forward migration of postotic myomeres, absent = 0, present = 1

114. Sexual dimorphism, absent = 0, present = 1

115. Larval phase, absent = 0, present = 1

**Data set**

Tunicata 000000000000000000?0000000010??00000000000000?0000000?0000?00000000000000000000000000000000000000000000000100001001

Cephalochordata 00?000000000000000?00000000000001000100010000?000000010000?00000000000000000000000000000000000000000000000000000001

Myxinoidea 10?1110010002111201100001110000010001000100101000000011110?10111000000010001000000000000000000000000000000000001100

*Myxinikela* 10??????????2111??1???????101?00??00????????010?0000?0??10??0??10?????01000?000000000000000000?????????????????????

Petromyzontida 1021210010112012111200112110110011011111001011010001101111111111011001100001000000000000000000111111111111111111111

*Mesomyzon* 10????????????????1???????101?00?101?????????10?000110?1111?????0?1???10000?000000000000000000?????????????????????

*Priscomyzon* 10????????????????0???????101?00??011???????000?000????11101????0?10?110000?000000000000000000?????????????????????

*Mayomyzon* 10???????????0?2??0???????101?00??011???????010?000(01)0??1??01?1??0?10?100000?000000000000000000?????????????????????

*Haikouichthys* 10????????????????1????????01000??00????????1001?000???000??10000?????00000?000000000000000000?????????????????????

Heterostraci 111???1?????????1?02101?22111000?100???????101000003111??0??1??00?????00100?110120112111021000?????????????????????

*Astraspis* 1?1??????????????????01?11101100???????????1?1??000???1?????????0???????100?11012210211??11??0?????????????????????

Arandaspida 1?1?????????????????????21100100??00????????010??00??01??0??????0?????001???1??000112211021?10?????????????????????

Anaspida 1?2?????????2?12????????21100100??00????????01111001101??0??????0?????00100?110000002201010000?????????????????????

*Jamoytius* 1???????????2?11??????????10010???10?????????0??100??01??0?1????0????1001????????????200000000?????????????????????

*Euphanerops* 1?????????????????????????100100?100?????????11000011?1????1????0????100?01100000??00?00000000?????????????????????

Osteostraci 1021?11?????2012?102111?22101011?110?11?01?1110101022011?0??1??00?1110001110101110102101020111?????????????????????

Galeaspida 112??11?????21121?021?1?22101011?110?????1?1?1??000??011?0??1??00?1110001110110000001101020100?????????????????????

*Loganellia* 1?????????????????????1?22?01100??00????????11101003101??0?????00?????00100?110110001100110000?????????????????????

Turinia 1?????????????????????????1011?0??00?????????1?010??1?1?????????0?????0010??1101200011001100?0?????????????????????

Jawed vertebrates 1111211101111000111311112200100101000111111011110112201000?01000111110001110101121102100110010111111111111111110010

Euconodonta 1????????????????11????????0???????0????????01010001101?00?????10??0?00?000?100131002000100000?????????????????????
